# Supplementary material for: Analysis of drug-susceptibility patterns and gene sequences associated with clarithromycin and amikacin resistance in serial Mycobacterium abscessus isolates from clinical specimens from Northeast Thailand
Source: PLoS One. 2018 Nov 29;13(11):e0208053. doi: 10.1371/journal.pone.0208053 (PMC6264522; doi:10.1371/journal.pone.0208053)
Supplement: S4 Table — (XLSX) [file pone.0208053.s004.xlsx]

## Sheet: Table1and2
พิม update ให้ครบ 68 และเติมข้อมูลความถี่
M abscesssus ( 26 cases/ N=68)
	Chracteritics	N	Number
	Age: mean (SD)	26	62 yr (14.85)
	Gender (male)	M	14 (53.84%)
M abscessus ( 26 cases/ N=68)
	Drug susceptibility pattern					MIC interpretation criteria
	Drugs in guideline	S	I	R	Natural resist	S	I	R
	Amikacin (n/%)	56 (82.35%)	7 (10.29%)	5 (7.35%)	No	≤16	32	≥64
	Cefoxitin	0 (0%)	11 (16.18%)	57 (83.82%)	No	≤16	32 - 64	≥128
	Ciprofloxacin	0 (0%)	0 (0%)	68 (100%)	No	≤1	2	≥4
	Charithomycin	33 (48.53%)	6 (8.82%)	29 (42.64%)	No	≤2	4	≥8
	Doxycycline	1(1.47%)	5 (7.35%)	62 (91.18%)	No	≤1	2 - 4.	≥8
	Imipenem	0 (0%)	0 (0%)	68 (100%)	Yes	≤4	8-16.	≥32
	Linezolid	10 (14.71%)	16 (23.53%)	42 (61.76%)	No	≤8	16	≥32
	Moxifloxacin	0 (0%)	2(2.94%)	66 (97.05%)	No	≤1	2	≥4
	Tobramycin	0 (0%)	1(1.47%)	67 (98.53%)	No	≤2	4	≥8
	Trimetroprim/Sulfamethoxazole	0 (0%)	0 (0%)	68 (100%)	No	≤2/38	-	≥4/76
	Drug without guidel line	Low	Moderate	High	Natural resist	Low	Moderate	High
	Minocycline	0 (0%)	0 (0%)	68 (100%)	No	≤2	4	≥8
	Tigecycline	34 (50%)	15 (22.06%)	19 (27.94%)	Yes	≤1	2	≥4
	Cefepime	0 (0%)	0 (0%)	68 (100%)	No	≤8	16	≥32
	Amoxicillin/Clavulanic Acid	0 (0%)	0 (0%)	68 (100%)	No	≤16	32	≥64
	Ceftriaxone	0 (0%)	0 (0%)	68 (100%)	No	≤16	32	≥64
Sub species analysis
	Drug susceptibility pattern				Drug susceptibility pattern			Among 3 patterns	S vs Comined I and R	MIC interpretation criteria
	Drugs in guideline	Massiliense M. abscessus (n=37)			Non massiliense M. abscessus (n=31)
		S	I	R	S	I	R			S	I	R
	Amikacin (n/%)	33 (89.19%)	2 (5.41%)	2 (5.41%)	23 (74.19%)	5 (16.13%)	3 (9.68%)	0.251	0.106	≤16	32	≥64
	Cefoxitin	0 (0%)	4 (10.81%)	33 (89.19%)	0 (0%)	7 (22.58%)	24 (77.42%)	0.189	NA	≤16	32 - 64	≥128
	Ciprofloxacin	0 (0%)	0 (0%)	37 (100%)	0 (0%)	0 (0%)	31 (100%)	NA	NA	≤1	2	≥4
	Charithomycin	26 (70.27%)	2 (5.41%)	9 (24.32%)	7 (22.58%)	4 (12.90%)	20 (64.52%)	<0.0001	<0.0001	≤2	4	≥8
	Doxycycline	0 (0%)	2 (5.41%)	35 (94.59%)	1 (3.23%)	3 (9.68%)	27 (87.10%)	0.424	0.456	≤1	2 - 4.	≥8
	Imipenem	0 (0%)	0 (0%)	37 (100%)	0 (0%)	0 (0%)	31 (100%)	NA	NA	≤4	8-16.	≥32
	Linezolid	3 (8.11%)	9 (24.32%)	25 (67.57%)	7 (22.58%)	7 (22.58%)	17 (54.84%)	0.239	0.167	≤8	16	≥32
	Moxifloxacin	0 (0%)	0 (0%)	37 (100%)	0 (0%)	2 (6.45%)	29 (93.55%)	NA	NA	≤1	2	≥4
	Tobramycin	0 (0%)	0 (0%)	37 (100%)	0 (0%)	1 (3.23%)	30 (96.77%)	NA	NA	≤2	4	≥8
	sxt/Sulfamethoxazole	0 (0%)	0 (0%)	37 (100%)	0 (0%)	0 (0%)	31 (100%)	NA	NA	≤2/38	-	≥4/76
	Drug without guidel line	Low	Moderate	High	Low	Moderate	High	Among 3 patterns	S vs Comined I and R	Low	Moderate	High
	Minocycline	0 (0%)	0 (0%)	37 (100%)	0 (0%)	0 (0%)	31 (100%)	NA	NA	≤2	4	≥8
	Tigecycline	14 (37.84%)	9 (24.32%)	14 (37.84%)	20 (64.52%)	6 (19.35%)	5 (16.13%)	0.066	0.028	≤1	2	≥4
	Cefepime	0 (0%)	0 (0%)	37 (100%)	0 (0%)	0 (0%)	31 (100%)	NA	NA	≤8	16	≥32
	Amoxicillin/Clavulanic Acid	0 (0%)	0 (0%)	37 (100%)	0 (0%)	0 (0%)	31 (100%)	NA	NA	≤16	32	≥64
	Ceftriaxone	0 (0%)	0 (0%)	37 (100%)	0 (0%)	0 (0%)	31 (100%)	NA	NA	≤16	32	≥64
		* subspecies massiliense was defiedn by deletion of erm41 at De61G, De62C and De156 - 429.

## Sheet: Table3
พิมเติมข้อมูล
	NO. of isolates	MIC results	Gene Sequencing	Specimens	Start colection date	Time line	Site of infection	Any Antibiotic Treatment	TB invoement	Outcome
Case#1	10	10	9	9 Tracheal suction and 1 neck pus	2014-04-28	15, 27, 28, 9 ,28, 63, 3, 4, 39	#1: Pulmonary #2: Neck pus (LN) #3-10: Pulmonary	#1,#2,#3: IRZE (for TB) #4,#5: Linezolid+clarithromycin #6, #7: Linezolid+clarithromycin+amikacin [no sequencing data for isolate#6] #8: clarithromycin+ciprofloxacin #9,#10: No data	Treted TB	Follow up
Case#2	2	2	2	2 skin swab (other site)	2013-06-12	8	Skin	#1: imipenem azithro oflox #2: imipenem linezolid azithro oflox		waiting for check HO
Case#3	3	3	3	2 Lympnote, 1 sputum	2013-01-09	2, 189	#1, #2: LN #3: Pumonary	#1, #2, #3: Clarithro ofloxacin doxycycline		Follow up
Case#4	2	2	2	1 Lympnode, 1 Plueral	2012-08-22	668	#1: LN #2: Pulmonary	#1: No treamtment #2: clarithro cipro		2017 Positive M. abscessus But 2018 no data
Case#5	2	2	2	2 Eye cornea	2015-07-09	8	Eye	#1: itraconazole, ampho B, amikacin #2: clarithromycin amikacin		Loss follow up	2016 follow up
Case#6	2	2	2	2 Sputum	2014-03-06	74	Pulmonary	#1, #2: Ciprofloxacin		Cured
Case#7	2	2	2	2 Sputum	2013-06-18	83	Pulmonary	No data		No data
Case#8	3	3	3	3 Sputum	2012-11-14	146, 77	Pulmonary	#1: Clarithro amikacin ETB #2: Clarithro ETB #3: azithro linezolid		waiting for check HO
Case#9	2	2	2	2 Sputum	2015-07-08	237	Pulmonary	#1: INH RIF #2: Clarithro ciprofloxacin		Cured ??? 23/3/2018 มารพ.อีก แต่ไม่ได้รักษาNTM แล้ว
Case#10	3	3	3	3 Sputum	2015-02-12	186, 156	Pulmonary	#1: No treatment #2: INH RIF ETB PZA #3: Clarithro ciprofloxacin		3/1/2018 มารพ.อีก But No data about treatment NTM
Case#11	4	4	3	4 Sputum	2015-06-22	56, 279, 68	Pulmonary	Old TB cases #1: INH ETB [no sequencing data for isolate#1] #2: INH ofloxacin streptomycin #3: Ethambutol,Isoniazid,Ofloxacin,Amikacin,Cifloxin #4: No treatment	Old TB case	Follow up
Case#12	2	2	2	2 Sputum	2013-06-28	405	Pulmonary	#1:IRZE (for TB) #2: Azithro ofloxacin ETB	Treted TB	Cured???, 2015 C/S No growth
Case#13	3	3	3	3 Sputum	2015-02-16	42, 42	Pulmonary	#1, #2, #3: CLR, ETH, INH, DOX, OFX		No data
Case#14	2	2	2	2 Sputum	2014-06-24	119	Pulmonary	#1: IRZE (for TB) #2: IRZES (for TB)	Treted TB	waiting for check HO
Case#15	2	2	2	2 Sputum	2012-09-28	6	Pulmonary	#1: No treatment #2: INH RIF ETB ciprofloxacin		waiting for check HO
Case#16	2	2	2	2 Sputum	2014-10-09	112	Pulmonary	Old TB case #1, #2: Clarithromycin,Doxycycline,Cifloxin	Old TB case	Cured
Case#17	2	3	2	2 Sputum	2016-07-02	24	Pulmonary	#1, #2: INH RIF ETB PZA CLR Doxy		Follow up
Case#18	2	2	2	1 hemocultre and 1 Bone marrow	2012-01-23	108	#1: Blood #2: Bone marrow	#1: Clarithromycin+ciprofloxacin #2: Clarithromycin+ciprofloxacin imipenem		Loss follow up
Case#19	2	2	2	2 Sputum	2013-07-30	394	Pulmonary	#1, #2: INH ETB		waiting for check HO
Case#20	2	2	2	2 Back pus	2012-12-06	1	#1: Back pus #2: other site pus	#1, #2: Ciprofloxacin,Cifloxin_(MAFB+ve)		waiting for check HO
Case#21	4	4	4	2 Tracheal suction and 2 sputum	2014-10-05	2, 1, 2	Pulmonary	#1, #2, #3, #4: INH RIF ETB strep_Old TB	Old TB case	waiting for check HO
Case#22	2	2	2	1 Sputum and 1 Lymnode	2012-01-30	1	#Pulmonary #LN	#1, #2: IRZE CLR_Old TB	Old TB case	2016 No treatment NTM
Case#23	2	2	2	1 hemocultre and 1 lympnode	2015-03-23	4	#1: Blood #2: LN	#1: INH, PZA, ETB, Ethionamind #2: Amikacin,Clarithromycin,Ofloxacin	Treted TB	Follow up
Case#24	2	2	2	2 Sputum	2015-11-23	84	Pulmonary	#1, #2: IRZE	Treted TB	Cured
Case#25	2	2	0	2 Sputum	2015-02-16	231	Pulmonary	#1: Kanamycin levofloxacin ETB cycloserine [no sequencing data for isolate#1, #2] #2: Kanamycin levofloxacin ETB cycloserine PAS_MDR TB	Old TB case	Loss follow up
Case#26	2	2	2	2 Lympnode (other site)	2016-04-25	37	Lymphnode	#1, #2: Clarithromycin,Ethambutol,Azithromycin,Amikacin,Rifampicin,Ofloxacin		Follow up
	68		64
	26 cases	26 cases	25 cases
								no Sequening data

## Sheet: Table 4
S4 Table. Raw data used in this study
PT No.	Lab No.	Date of isolation	Timeline	AMK		AMC		FEP		FOX		CRO		CIP		DOX		IMI		LZD		MIN		MFX		TGC		TOB		SXT		CLA							Variants
				D5		D5		D5		D5		D5		D5		D5		D5		D5		D5		D5		D5		D5		D5		D3		D5		D14		Inducible R	rrl		Erm[41]		Massiliense markers
																																							SNP	Indel	T159C, A238G, G255A, G279T, A330C, T336C, C419T	Other variants	C41A, A46G, De61G, De62C, G85T, C90T, G109A, A123G, De156-429, A438C
Pt1 E1	81499	2014-04-28	-	64	R	64	H	32	H	128	R	64	H	4	R	16	R	64	R	32	R	8	H	8	R	4	H	16	R	8	R	16	R	16	R	16	R	-	-	De1954A	-	Del11A,De26A, G466A	/
Pt1 E2	81692	2014-05-13	15	8	S	64	H	32	H	128	R	64	H	4	R	16	R	64	R	32	R	8	H	8	R	0.5	L	16	R	8	R	0.12	S	0.25	S	0.5	S	-	-	De1954A	-	Del11A,De26A, G466A	/
Pt1 E3	81985	2014-06-09	27	16	S	64	H	32	H	128	R	64	H	4	R	16	R	64	R	16	I	8	H	8	R	1	L	16	R	8	R	0.12	S	0.25	S	0.25	S	-	-	De1954A	-	Del11A,De26A, G466A	/
Pt1 E4	82319	2014-07-07	28	8	S	64	H	32	H	128	R	64	H	4	R	16	R	64	R	16	I	8	H	8	R	2	M	16	R	8	R	0.12	S	0.25	S	1	S	-	-	De1954A	-	Del11A,De26A, G466A	/
Pt1 E5	82406	2014-07-16	9	8	S	64	H	32	H	128	R	64	H	4	R	16	R	64	R	16	I	8	H	8	R	2	M	16	R	8	R	0.12	S	0.5	S	4	I	-	-	De1954A	-	Del11A,De26A, G466A	/
Pt1 E6	82724	2014-08-14	29	64	R	64	H	32	H	128	R	64	H	4	R	16	R	64	R	32	R	8	H	8	R	4	H	16	R	8	R	16		16	R	16	R	-	NA	NA	NA	NA	NA
Pt1 E7	83409	2014-10-16	63	8	S	64	H	32	H	128	R	64	H	4	R	16	R	64	R	32	R	8	H	8	R	1	L	16	R	8	R	16	R	16	R	16	R	-	Ins2103C, Ins2734G	De1954A	-	Del11A,De26A, G466A	/
Pt1 E8	83448	2014-10-19	3	8	S	64	H	32	H	128	R	64	H	4	R	16	R	64	R	32	R	8	H	8	R	0.5	L	16	R	8	R	16	R	16	R	16	R	-	A2271G	De1954A	-	Del11A,G466A	/
Pt1 E9	83483	2014-10-22	3	8	S	64	H	32	H	128	R	64	H	4	R	16	R	64	R	16	I	8	H	8	R	0.5	L	16	R	8	R	16	R	16	R	16	R	-	Ins2004C, A2271G, Ins2734G	De1954A	-	Del11A,G466A	/
Pt1 E10	83880	2014-11-30	39	8	S	64	H	32	H	128	R	64	H	4	R	16	R	64	R	32	R	8	H	8	R	1	L	16	R	8	R	16	R	16	R	16	R	-	A2271G	De1954A	-	Del11A,G466A	/
Pt2 E1	81618	2013-06-12	-	32	I	64	H	32	H	64	I	64	H	4	R	16	R	64	R	16	I	8	H	2	I	1	L	16	R	8	R	16	R	16	R	16	R	-	A2271C	De1954A	-	Del11A,De26A, G158A	-
Pt2 E2	81694	2013-06-20	8	4	S	64	H	32	H	64	I	64	H	4	R	16	R	32	R	4	S	8	H	8	R	0.12	L	4	I	8	R	16	R	16	R	16	R	-	A2271C	De1954A	-	Del11A,De26A, G158A	-
Pt3 E1	80097	2013-01-09	-	8	S	64	H	32	H	64	I	64	H	4	R	16	R	64	R	32	R	8	H	8	R	2	M	8	R	8	R	0.25	S	8	R	16	R	Yes	-	De1954A	T159C, A238G, G255A,A330C	Del11A	-
Pt3 E2	80127	2013-01-11	2	64	R	64	H	32	H	128	R	64	H	4	R	16	R	64	R	32	R	8	H	8	R	4	H	16	R	8	R	16	R	16	R	16	R	-	Ins1977A	De1954A	T159C, A238G, G255A,A330C	Del11A	-
Pt3 E3	82048	2013-07-19	189	32	I	64	H	32	H	128	R	64	H	4	R	16	R	64	R	32	R	8	H	8	R	4	H	16	R	8	R	2	S	16	R	16	R	Yes	-	De1954A	T159C, A238G, G255A,A330C	Del11A,De26A	-
Pt4 E1	82119	2012-08-22	-	16	S	64	H	32	H	128	R	64	H	4	R	16	R	64	R	32	R	8	H	8	R	2	M	16	R	8	R	2	S	16	R	16	R	Yes	-	De1954A	T159C, A238G, G255A, G279T, A330C, T336C, C419T	Del11A,De26A	-
Pt4 E2	82022	2014-06-12	659	32	I	64	H	32	H	128	R	64	H	4	R	16	R	64	R	32	R	8	H	8	R	0.5	L	16	R	8	R	0.12	S	16	R	16	R	Yes	C2695T	De1954A	T159C, A238G, G255A, G279T, A330C, T336C, C419T	Del11A,De26A	-
Pt5 E1	90919	2015-07-09	-	16	S	64	H	32	H	64	I	64	H	4	R	16	R	64	R	32	R	8	H	8	R	4	H	16	R	8	R	0.12	S	0.12	S	0.5	S	-	-	De1954A	-	Del11A,De26A	/
Pt5 E2	90956	2015-07-17	8	32	I	64	H	32	H	128	R	64	H	4	R	16	R	64	R	32	R	8	H	8	R	4	H	16	R	8	R	1	S	2	S	2	S	-	-	De1954A	-	Del11A, De26A, C54T, T55A	/
Pt6 E1	80824	2014-03-06	-	8	S	64	H	32	H	128	R	64	H	4	R	16	R	64	R	32	R	8	H	8	R	0.5	L	8	R	8	R	0.25	S	0.5	S	1	S	-	-	De1954A	-	Del11A, G466A	/
Pt6 E2	81734	2014-05-19	74	8	S	64	H	32	H	128	R	64	H	4	R	16	R	32	R	32	R	8	H	8	R	2	M	16	R	8	R	4	I	4	I	4	I	-	-	De1954A	-	Del11A,De26A, G466A	/
Pt7 E1	81652	2013-06-18	-	8	S	64	H	32	H	128	R	64	H	4	R	16	R	64	R	32	R	8	H	8	R	1	L	8	R	8	R	0.12	S	0.25	S	1	S	-	-	De1954A	-	Del11A,De26A, G466A	/
Pt7 E2	82649/13	2013-09-10	84	4	S	≥64	H	≥32	H	128	R	≥64	H	≥4	R	≥16	R	≥64	R	16	I	≥8	H	≥8	R	4	H	16	R	≥8	R	0.12	S	0.12	S	0.5	S	-	Ins2080T	De1954A	-	Del11A, De26A, G466A	/
Pt8 E1	83052	2012-11-14	-	8	S	64	H	32	H	128	R	64	H	4	R	16	R	64	R	32	R	8	H	8	R	0.5	L	8	R	8	R	2	S	4	I	≥16	R	Yes	-	De1954A	T159C, A238G, G255A,A330C	Del11A	-
Pt8 E2	80988	2013-04-09	146	8	S	64	H	32	H	128	R	64	H	4	R	16	R	64	R	32	R	8	H	8	R	1	L	16	R	8	R	0.12	S	0.25	S	16	R	Yes	Ins2080C	De1954A	T159C, A238G, G255A,A330C	Del11A	-
Pt8 E3	81748	2013-06-25	77	16	S	64	H	32	H	128	R	64	H	4	R	16	R	64	R	16	I	8	H	8	R	0.25	L	8	R	8	R	0.12	S	0.5	S	8	R	Yes	Ins2004C, C2078A	De1954A	T159C, A238G, G255A,A330C	In11A	-
Pt9 E1	81770	2015-07-08	-	8	S	64	H	32	H	128	R	64	H	4	R	16	R	64	R	32	R	8	H	8	R	4	H	16	R	8	R	0.25	S	0.5	S	4	I	-	-	De1954A	-	Del11A, G466A	/
Pt9 E2	80524	2016-03-03	238	8	S	64	H	32	H	128	R	64	H	4	R	16	R	64	R	16	I	8	H	8	R	2	M	16	R	8	R	0.5	S	2	S	2	S	-	Ins2779GC	De1954A	-	Del11A, G466A	/
Pt10 E1	80448	2015-02-12	-	16	S	≥64	H	≥32	H	≥128	R	≥64	H	≥4	R	≥16	R	≥64	R	16	I	≥8	H	≥8	R	2	M	≥16	R	8≥	R	0.12	S	0.25	S	2	S	-	Ins2622A, Ins2734G	De1954A	-	Del11A, 'G466A	/
Pt10 E2	82151	2015-08-17	186	8	S	64	H	32	H	64	I	64	H	4	R	16	R	64	R	32	R	8	H	8	R	2	M	16	R	8	R	0.25	S	0.5	S	2	S	-	-	De1954A	-	Del11A, 'G466A	/
Pt10 E3	80108	2016-01-14	150	8	S	64	H	32	H	128	R	64	H	4	R	16	R	64	R	4	S	8	H	4	R	1	L	16	R	8	R	0.12	S	0.12	S	0.25	S	-	-	De1954A	-	Del11A, 'G466A	/
Pt11 E1	81637	2015-06-22	-	16	S	≥64	H	≥32	H	≥128	R	≥64	H	≥4	R	≥16	R	≥64	R	32	R	≥8	H	≥8	R	4	H	16	R	≥8	R	0.25		0.5	S	1	S	-	NA	NA	NA	NA	NA
Pt11 E2	82157	2015-08-17	56	8	S	64	H	32	H	128	R	64	H	4	R	16	R	64	R	32	R	8	H	8	R	4	H	16	R	8	R	1	S	1	S	1	S	-	Ins2759G	De1954A	-	Del11A, 'G466A	/
Pt11 E3	81235	2016-05-23	279	16	S	64	H	32	H	128	R	64	H	4	R	16	R	64	R	32	R	8	H	8	R	2	M	16	R	8	R	0.5	S	0.5	S	1	S	-	-	De1954A	-	Del11A, 'G466A	/
Pt11 E4	81838	2016-08-01	70	8	S	64	H	32	H	128	R	64	H	4	R	16	R	64	R	32	R	8	H	8	R	4	H	16	R	8	R	16	R	16	R	≥16	R	-	-	De1954A	-	Del11A, 'G466A	/
Pt12 E1	81790	2013-06-28	-	8	S	64	H	32	H	128	R	64	H	4	R	2	I	64	R	32	R	2	L	8	R	1	L	16	R	8	R	4	I	4	I	4	I	-	Ins1969C	De1954A	-	Del11A	/
Pt12 E2	82649	2014-08-08	406	16	S	64	H	32	H	64	I	64	H	4	R	2	I	64	R	32	R	4	H	8	R	2	M	16	R	8	R	0.12	S	0.25	S	16	R	Yes	-	De1954A	-	Del11A	/
Pt13 E1	80492	2015-02-16	-	8	S	64	H	32	H	128	R	64	H	4	R	1	S	64	R	16	I	≤1	L	8	R	0.5	L	16	R	8	R	0.5	S	4	I	16	R	Yes	Ins2045C	De1954A	T159C, A238G, G255A, G279T, A330C, T336C	Del11A	-
Pt13 E2	80901	2015-03-30	42	8	S	64	H	32	H	128	R	64	H	4	R	2	I	64	R	32	R	8	H	8	R	2	M	8	R	8	R	1	S	8	R	16	R	Yes	Ins2004C	De1954A	T159C, A238G, G255A, G279T, A330C, T336C	Del11A	-
Pt13 E3	81279	2015-05-12	43	8	S	64	H	32	H	128	R	64	H	4	R	2	I	64	R	32	R	2	L	8	R	2	M	16	R	8	R	1	S	8	R	16	R	Yes	-	De1954A	T159C, A238G, G255A, G279T, A330C, T336C	Del11A	-
Pt14 E1	82154	2014-06-24	-	32	I	64	H	32	H	128	R	64	H	4	R	16	R	64	R	32	R	8	H	8	R	2	M	16	R	8	R	0.5	S	8	R	16	R	Yes	C2568T	De1954A	T159C, A238G, G255A,A330C	Del11A,	-
Pt14 E2	83469	2014-10-21	119	32	I	64	H	32	H	128	R	64	H	4	R	16	R	64	R	32	R	8	H	8	R	4	H	16	R	8	R	1	S	8	R	16	R	Yes	C2568T	De1954A	T159C, A238G, G255A,A330C	Del11A,	-
Pt15 E1	82535	2012-09-28	-	8	S	64	H	32	H	128	R	64	H	4	R	16	R	64	R	32	R	8	H	8	R	4	H	16	R	8	R	0.12	S	0.12	S	0.25	S	-	Ins2058G	De1954A	-	Del11A, 'G466A	/
Pt15 E2	82593	2012-10-04	6	8	S	64	H	32	H	128	R	64	H	4	R	16	R	64	R	16	I	8	H	8	R	2	M	8	R	8	R	≤0.06	S	0.12	S	0.5	S	-	-	De1954A	-	Del11A, 'G466A	/
Pt16 E1	83347	2014-10-09	-	32	I	64	H	32	H	128	R	64	H	4	R	16	R	64	R	32	R	8	H	8	R	4	H	16	R	8	R	0.25	S	0.5	S	0.5	S	-	-	De1954A	-	Del11A, 'G466A	/
Pt16 E2	80278	2015-01-29	112	16	S	64	H	32	H	128	R	64	H	4	R	16	R	64	R	32	R	8	H	8	R	4	H	16	R	8	R	0.5	S	0.5	S	1	S	-	-	De1954A	-	Del11A, 'G466A	/
Pt17 E1	81614	2016-07-02	-	8	S	64	H	32	H	128	R	64	H	4	R	16	R	64	R	32	R	8	H	8	R	1	L	16	R	8	R	0.25	S	0.5	S	1	S	-	Ins1977A	De1954A	-	Del11A, 'G466A	/
Pt17 E2	81779	2016-07-26	24	4	S	64	H	32	H	128	R	64	H	4	R	16	R	64	R	16	I	8	H	8	R	0.25	L	16	R	8	R	0.12	S	0.25	S	1	S	-	-	De1954A	-	Del11A, 'G466A	/
Pt18 E1	80167	2012-01-23	-	8	S	≥64	H	≥32	H	128	R	≥64	H	≥4	R	≥16	R	32	R	8	S	≥8	H	8	R	0.25	L	16	R	≥8	R	≥16	R	≥16	R	≥16	R	-	A2271G	De1954A	-	Del11A, 'G466A	/
Pt18 E2	81109	2012-05-11	108	8	S	≥64	H	≥32	H	64	I	≥64	H	≥4	R	≥16	R	32	R	8	S	≥8	H	8	R	1	L	8	R	8≥	R	≥16	R	≥16	R	≥16	R	-	A2271G	De1954A	-	Del11A, 'G466A	/
Pt19 E1	82144	2013-07-30	-	8	S	≥64	H	≥32	H	≥128	R	≥64	H	≥4	R	≥16	R	≥64	R	32	R	≥8	H	≥8	R	4	H	16	R	≥8	R	0.25	S	0.5	S	2	S	-	-	De1954A	-	Del11A, 'G466A	/
Pt19 E2	82895	2014-08-29	394	8	S	≥64	H	≥32	H	≥128	R	≥64	H	≥4	R	≥16	R	≥64	R	32	R	≥8	H	≥8	R	4	H	16	R	≥8	R	0.25	S	0.5	S	2	S	-	-	De1954A	-	Del11A, 'G466A	/
Pt20 E1	83292	2012-12-06	-	16	S	64	H	32	H	128	R	64	H	4	R	16	R	64	R	32	R	8	H	8	R	1	L	16	R	8	R	2	S	16	R	16	R	Yes	-	De1954A	T159C, A238G, G255A,A330C	In11A, A120G	-
Pt20 E2	83305	2012-12-07	1	64	R	64	H	32	H	128	R	64	H	4	R	16	R	64	R	32	R	8	H	8	R	4	H	16	R	8	R	16	R	16	R	16	R	-	-	De1954A	T159C, A238G, G255A,A330C	In11A, A120G	-
Pt21 E1	83310	2014-10-05	-	8	S	64	H	32	H	128	R	64	H	4	R	16	R	64	R	16	I	8	H	8	R	1	L	16	R	8	R	8	R	8	R	≥16	R	-	-	De1954A	T159C, A238G, G255A, G279T, A330C, T336C	Del11A	-
Pt21 E2	83336	2014-10-07	2	8	S	64	H	32	H	128	R	64	H	4	R	16	R	64	R	32	R	8	H	8	R	0.12	L	16	R	8	R	0.25	S	1	S	≥16	R	Yes	Ins1969C	De1954A	T159C, A238G, G255A, G279T, A330C, T336C	Del11A	-
Pt21 E3	83343	2014-10-08	1	8	S	64	H	32	H	128	R	64	H	4	R	16	R	64	R	16	I	8	H	8	R	1	L	16	R	8	R	1	S	8	R	≥16	R	Yes	-	De1954A	T159C, A238G, G255A, G279T, A330C, T336C	Del11A	-
Pt21 E4	83361	2014-10-10	2	8	S	64	H	32	H	128	R	64	H	4	R	16	R	64	R	32	R	8	H	8	R	0.5	L	16	R	8	R	4	I	8	R	≥16	R	-	-	De1954A	T159C, A238G, G255A, G279T, A330C, T336C	Del11A	-
Pt22 E1	80225	2012-01-30	-	8	S	≥64	H	≥32	H	128	R	≥64	H	≥4	R	≥16	R	64	R	4	S	≥8	H	8	R	0.5	L	16	R	≥8	R	0.25	S	4	I	≥16	R	Yes	Ins2103C	De1954A	T159C, A238G, G255A, G279T, A330C, T336C	Del11A, A120G	-
Pt22 E2	80242	2012-01-31	1	4	S	≥64	H	≥32	H	32	I	≥64	H	≥4	R	≥16	R	64	R	8	S	≥8	H	8	R	0.25	L	8	R	≥8	R	0.12	S	2	S	≥16	R	Yes	Ins2103C	De1954A	T159C, A238G, G255A, G279T, A330C, T336C	Del11A, A120G	-
Pt23 E1	80838	2015-03-23	-	8	S	64	H	32	H	128	R	64	H	4	R	16	R	64	R	32	R	8	H	8	R	4	H	16	R	8	R	1	S	16	R	16	R	Yes	Ins2004C, Ins2058G, C2078A, Ins2080C	De1954A	T159C, A238G, G255A, G279T, A330C, T336C	Del11A	-
Pt23 E2	80879	2015-03-27	4	16	S	64	H	32	H	128	R	64	H	4	R	16	R	64	R	32	R	8	H	8	R	2	M	16	R	8	R	0.5	S	4	I	16	R	Yes	Ins2103C, C2078A, Ins2080C	De1954A	T159C, A238G, G255A, G279T, A330C, T336C	Del11A	-
Pt24 E1	82998	2015-11-23	-	4	S	64	H	32	H	64	I	64	H	4	R	16	R	64	R	8	S	8	H	2	I	1	L	16	R	8	R	16	R	16	R	16	R	-	Ins1977A, Ins2759T	De1954A	T159C, A330C, C419T	Del11A	-
Pt24 E2	80384	2016-02-15	84	4	S	64	H	32	H	64	I	64	H	4	R	16	R	64	R	16	I	8	H	8	R	0.5	L	16	R	8	R	16	R	16	R	16	R	-	-	De1954A	T159C, A330C, C419T	Del11A	-
Pt25 E1	80481	2015-02-16	-	64	R	64	H	32	H	64	R	64	H	4	R	16	R	64	R	16	I	8	H	8	R	1	L	16	R	8	R	16		16	R	16	R	-	NA	NA	NA	NA	NA
Pt25 E2	82583	2015-10-05	231	4	S	64	H	32	H	128	R	64	H	4	R	4	I	64	R	2	S	≤1	L	8	R	0.5	L	16	R	8	R	0.25		0.25	S	0.25	S	-	NA	NA	NA	NA	NA
Pt26 E1	90514	2016-04-25	-	4	S	>64	H	>32	H	128	R	>64	H	>4	R	>16	R	>64	R	4	S	>8	H	>8	R	0.5	L	8	R	>8	R	0.5	S	1	S	≥16	R	Yes	-	De1954A	T159C, A238G, G255A, G279T, A330C, T336C, C419T	Del11A	-
Pt26 E2	81348	2016-06-01	37	4	S	>64	H	>32	H	128	R	>64	H	>4	R	>16	R	>64	R	4	S	>8	H	>8	R	0.5	L	8	R	>8	R	0.5	S	1	S	≥16	R	Yes	Ins2103C	De1954A	T159C, A238G, G255A, G279T, A330C, T336C, C419T	Del11A	-
Note: MIC=Minimum inhibitory concentration (µg/ml), D5=Day 5, D3=Day3, D14=Day14, AMK=Amikacin, AMC=Amoxicillin/clavulanic acid, FEP=Cefepime, CRO=Ceftriaxone, CIP=Ciprofloxacin, Dox=Doxycycline, IMI=Imipenem, FOX=Cefoxitin, CLA=Clarithromycin, LZD=Linezolid, MFX=Moxifloxacin, Min=Minocycline, TGC=Tigecycline, TOB=Tobramycin, SXT=Trimethoprim/sulfamethoxazole
S=Susceptible, I=Intermediate, R=Resistant, L=Low resistance, M=Moderate resistance, H=High resistance, NA=Not available, Inducible R= inducible resistance, Pt= Pateint number, E=Episode number

## Sheet: Table 5
	รอ dsicuss กับพิมอีกครั้ง
Inter pateint anlaysis
rrs_AMK	Length= 1600 bp
	Amikacin	N (%)	SNP	Indel	SNP high variation 2 SNPs	In one position maybe change morethan 0ne base such as A2271C/G.
1	R day 5	3 (4.69)	1 isolates found C977T	-	-
	I day 5	7 (10.94)	1 isolates foundC977T/1 isolate found Ins583T	-	-
	S day 5	54 (84.38)	1 isolates found A52T, A53C, C56A, G57T. 1 isolates found Ins798G 1 isolates found Ins807T 1 isolates found C809T 1 isolates found T811C 2 isolates found Ins812G and 1 isolate found Ins812Tin the same position. 1 isolates found Ins851G 4 isolates found Ins891G 1 isolates found Ins894G 1 isolates found Ins910G 2 isolates found Ins919G 1 isolate found G921T 7 isolates found Ins926T 1 isolate found …	1 isolate found Del54G	-	Previously SNP in 1406 of rrs associedted with AMK resistance of M. abscessus. In our study, we found 3 isolates of resistant and 4 intermediate resistance. No mutation was found to assoiate to theAMK resistance pattern from our study.
	Amikacin
	SNP	Base	N (%)	MIC (mean [ SD])	P-values
2	A976G	A	53 (82.81%)	15.25 [14.76]	0.086
		G	11 (17.19%)	8.00 [3.10]
	C977T	C	43 (67.19%)	14.33 [14.24]	0.59	No mutation of rrs associated with MIC level of AMK.
		T	21 (32.81%)	13.33 [12.98]
	* these 2 highly varaable SNPs were slected
	Clarithomycin (erm41 and rrl) Length = 522 bp
erm41
1	M. massiliense	N (%)	SNP	Indel
	S day5 {MIC=≤2]	25 (71.43)	25 isolates found C41A, 25 isolates found A46G, 25 isolates found G85T, 25 isolates found C90T, 25 isolates found G109A, 25 isolates found A123G, 25 isolates found A438C, 25 isolates found G466A	25 isolates found Del61G, Del62C and Del156-429.
	I day 5 {MIC=4}	2 (5.71)	2 isolates found C41A, A46G, G85T,C90T, G109A, A123G, A438C, G466A	2 isolates found Del61G, Del62C and Del156-429.
	R day3-->14 {MIC=≥8}	8 (22.86)	8 isolates found C41A, A46G,G85T,C90T, G109A,A438C, G466A	8 isolates found Del61G, Del62C and Del156-429. 8 isolates found Del11A and 2 isolates found Del26A	5/8 explianed by rrl A2271G
2	Non-massileinsae	N (%)
	Inducible R	21			27/29 explained by T159C/A238G/G255A/A330C
	R day3-->14	8			29/29 explained by G158A/T159C/A238G/G255A/A330C
					15/29 explained by G279T/T336C
	ตารางนี้ ค้างไว้ก่อนค่ะ
	Claritho
	SNP	Base	N (%)	MIC (mean [ SD])	P-values
2	#1 2 3 4 5	Wt			t-test
		Mt
	#1 2 3 4 5	C			t-test
		T
	C977T	C			t-test
		T
	C977T	C			t-test
		T
	C977T	C			t-test
		T
rrl
	Length = 1100 bp
	Clarithromycin	N (%)	SNP	Indel	SNP high variation 2 SNPs
	R day 5	27 (42.19)	2 isolates found Ins1977A 3 isolates found Ins2004C 1 isolate found Ins2058G, C2078A, Ins2080C 5 isolates found A2271G and 2 isolates found A2271C 1 isolate found C2568T 1 isolate found C2695T 1 isolate found Ins2734G 1 isolate found Ins2759G	-	-
	I day 5	6 (56.25)	1 isolate found Ins1969C, 1 isolate found Ins2045C, 1 isolate found C2078A, 1 isolate found Ins2080C, 2 isolate found Ins2103C	-	-
	S day 5	31 (48.44)	1 isolate found Ins2004C, 1 isolate found Ins2058G, 1 isolate found C2078A, 1 isolate found Ins2080C, 2 isolate found Ins2103C, 1 isolate found Ins2522A, 1 isolate found Ins2734G, 1 isolate found Ins2759G	-	-
	Clarithromycin
	SNP	Base	N (%)	MIC (mean)	P-value
	A2271G/C	A (wt)	57 (89.06)	6.07	0.001
		G	5 (7.81)	5.91
		C	2 (3.13)	16

## Sheet: Intra patient
Patient	Drug	Pulmonary MIC	Extra-pulmonary MIC	Ratio	Ratio			Patient	Drug	Pulmonary MIC	Extra-pulmonary MIC	Ratio Pul	Ratio ExtraPul
PT1 EP1	Amikacin	64	64	1	1				Amikacin	#NAME?	#NAME?	#NAME?	#NAME?
	Cefoxitin	128	128	1	1				Cefoxitin	#NAME?	#NAME?	#NAME?	#NAME?
	Ciprofloxacin	4	4	1	1				Ciprofloxacin	#NAME?	#NAME?	#NAME?	#NAME?
	Clarithromycin	16	0.25	64	1	64			Clarithromycin	#NAME?	#NAME?	#NAME?	#NAME?
	Doxycycline	16	16	1:1'					Doxycycline	#NAME?	#NAME?	#NAME?	#NAME?
	Imipenem	64	64	1:1'					Imipenem	#NAME?	#NAME?	#NAME?	#NAME?
	Linezolid	32	32	1:1'					Linezolid	#NAME?	#NAME?	#NAME?	#NAME?
	Moxifloxacin	8	8	1:1'					Moxifloxacin	#NAME?	#NAME?	#NAME?	#NAME?
	Tobramycin	16	16	1:1'					Tobramycin	#NAME?	#NAME?	#NAME?	#NAME?
	SXT	8	8	1:1'					SXT	#NAME?	#NAME?	#NAME?	#NAME?
	Minocycline	8	8	1:1'					Minocycline	#NAME?	#NAME?	#NAME?	#NAME?
	Tigecycline	4	0.5	4:0.5'					Tigecycline	#NAME?	#NAME?	#NAME?	#NAME?
	Cefepime	32	32	1:1'					Cefepime	#NAME?	#NAME?	#NAME?	#NAME?
	AMC	64	64	1:1'					AMC	#NAME?	#NAME?	#NAME?	#NAME?
	Ceftriaxone	64	64	1:1'					Ceftriaxone	#NAME?	#NAME?	#NAME?	#NAME?
PT3 EP1	Amikacin	64	8	8:1'
	Cefoxitin	128	64	2:1'
	Ciprofloxacin	4	4	1:1'
	Clarithromycin	16	8	2:1'
	Doxycycline	16	16	1:1'
	Imipenem	64	64	1:1'
	Linezolid	32	32	1:1'
	Moxifloxacin	8	8	1:1'
	Tobramycin	16	8	2:1'
	SXT	8	8	1:1'
	Minocycline	8	8	1:1'
	Tigecycline	4	2	2:1'
	Cefepime	32	32	1:1'
	AMC	64	64	1:1'
	Ceftriaxone	64	64	1:1'
PT4 EP1	Amikacin	32	16	2:1'
	Cefoxitin	128	128	1:1'
	Ciprofloxacin	4	4	1:1'
	Clarithromycin	16	16	1:1'
	Doxycycline	16	16	1:1'
	Imipenem	64	64	1:1'
	Linezolid	32	32	1:1'
	Moxifloxacin	8	8	1:1'
	Tobramycin	16	16	1:1'
	SXT	8	8	1:1'
	Minocycline	8	8	1:1'
	Tigecycline	0.5	2	0.5:2'
	Cefepime	32	32	1:1'
	AMC	64	64	1:1'
	Ceftriaxone	64	64	1:1'
PT22 EP1	Amikacin	8	4	2:1'
	Cefoxitin	128	32	4:1'
	Ciprofloxacin	4	4	1:1'
	Clarithromycin	4	2	2:1'
	Doxycycline	16	16	1:1'
	Imipenem	64	64	1:1'
	Linezolid	4	8	1:2'
	Moxifloxacin	8	8	1:1'
	Tobramycin	16	8	2:1'
	SXT	8	8	1:1'
	Minocycline	8	8	1:1'
	Tigecycline	0.5	0.25	2:1'
	Cefepime	32	32	1:1'
	AMC	64	64	1:1'
	Ceftriaxone	64	64	1:1'

## Sheet: Sheet1
หลักสูตร การวิจัย และการบริการ	ผู้เรียนและผู้รับบริการ	กระบวนการส่งมอบ
การจัดการศึกษา	นักศึกษาแพทย์/ วิทยาศาสตร์การแพทย์	- การจัดการเรียนการสอนในหลักสูตรต่างๆ โดยเน้น outcome based learning
- ระดับปริญญาตรี
- ระดับบัณฑิตศึกษา	นักศึกษาระดับบัณฑิตศึกษา/ แพทย์ประจำบ้าน
การวิจัยและนวัตกรรม	ผู้ให้ทุนวิจัย	ผลิตผลงานวิจัย ตีพิมพ์ผลงานวิจัย และสร้างนวัตกรรมวิจัย
การบริการรักษาพยาบาล	ผู้ป่วยและผู้รับบริการ	การตรวจวินิจฉัย การให้การรักษา และแนวทางการป้องกัน โดยโรงพยาบาลศรีนครินทร์ ศูนย์ความเป็นเลิศต่างๆ (COEs) และศูนย์หัวใจสิริกิติ์
					480
						240
						144

## Sheet: Sheet2
0=massiliense M. abscessus		g	dst		cefox		clr
1=Non massiliense M. abscessus	1	0	2		0	1		0=massiliense M. abscessus
	2	0	2		0	1		1=Non massiliense M. abscessus
1=Susceptible	3	0	3		0	1		1= S	G	DST
2=Intermediate	4	0	3		0	1		2= IR	CLR
3=Resistant	5	0	1		0	1			0	1
	6	0	1		0	1			0	1
1= S	7	0	1		0	1			0	1
2= IR	8	0	1		0	1			0	1
	9	0	1		0	1			0	1
	10	0	1		0	1			0	1
	11	0	1		0	1			0	1
	12	0	1		0	1			0	1
	13	0	1		0	1			0	1
	14	0	1		0	1			0	1
	15	0	1		0	2			0	1
	16	0	1		0	2			0	1
	17	0	1		0	2			0	1
	18	0	1		0	2			0	1
	19	0	1		0	2			0	2
	20	0	1		0	2			0	2
	21	0	1		0	2			0	2
	22	0	1		0	2			0	2
	23	0	1		0	2			0	2
	24	0	1		0	3			0	2
	25	0	1		0	3			0	2
	26	0	1		0	3			0	2
	27	0	1		0	3			0	2
	28	0	1		0	3			0	2
	29	0	1		0	3			0	2
	30	0	1		0	3			0	2
	31	0	1		0	3			0	2
	32	0	1		0	3			0	2
	33	0	1		0	3			0	2
	34	0	1		0	3			0	2
	35	0	1		0	3			0	2
	36	0	1		0	3			0	2
	37	0	1		0	3			0	2
	38	1	2		1	1			0	2
	39	1	2		1	1			0	2
	40	1	2		1	1			0	2
	41	1	2		1	1			0	2
	42	1	2		1	1			1	1
	43	1	3		1	1			1	1
	44	1	3		1	1			1	1
	45	1	3		1	1			1	1
	46	1	1		1	1			1	1
	47	1	1		1	1			1	1
	48	1	1		1	1			1	1
	49	1	1		1	1			1	1
	50	1	1		1	1			1	1
	51	1	1		1	1			1	1
	52	1	1		1	1			1	1
	53	1	1		1	1			1	1
	54	1	1		1	1			1	1
	55	1	1		1	1			1	1
	56	1	1		1	1			1	1
	57	1	1		1	1			1	1
	58	1	1		1	2			1	1
	59	1	1		1	2			1	1
	60	1	1		1	2			1	1
	61	1	1		1	2			1	1
	62	1	1		1	2			1	2
	63	1	1		1	2			1	2
	64	1	1		1	3			1	2
	65	1	1		1	3			1	2
	66	1	1		1	3			1	2
	67	1	1		1	3			1	2
	68	1	1		1	3			1	2
	69								1	2
	70								1	2
	71								1	2
	72								1	2
	73
	74
	75
	76
	77
	78
	79
	80
	81
	82
	83
	84
	85
	86
	87
	88
	89
	90
	91
	92
	93
	94
	95
	96
	97

## Sheet: Sheet3
AMK		AMC		FEP		FOX		CRO		CIP		DOX		IMI		LZD		MIN		MFX		TGC		TOB		CLA		SXT
Group	MIC	G	MIC	G	MIC	G	MIC	G	MIC	G	MIC	G	MIC	G	MIC	G	MIC	G	MIC	G	MIC	G	MIC	G	MIC	G	MIC	G	MIC
1	64	1	64	1	32	1	128	1	64	1	4	1	16	1	64	1	32	1	8	1	8	1	4	1	16	1	16	1	8
1	8	1	64	1	32	1	128	1	64	1	4	1	16	1	64	1	32	1	8	1	8	1	0.5	1	16	1	0.25	1	8
1	16	1	64	1	32	1	128	1	64	1	4	1	16	1	64	1	16	1	8	1	8	1	1	1	16	1	0.25	1	8
1	8	1	64	1	32	1	128	1	64	1	4	1	16	1	64	1	32	1	8	1	8	1	0.5	1	8	1	4	1	8
1	8	1	64	1	32	1	128	1	64	1	4	1	16	1	64	1	32	1	8	1	8	1	1	1	16	1	0.25	1	8
1	8	1	64	1	32	1	128	1	64	1	4	1	16	1	64	1	32	1	8	1	8	1	4	1	16	1	0.5	1	8
1	8	1	64	1	32	1	64	1	64	1	4	1	16	1	64	1	32	1	8	1	8	1	2	1	16	1	0.5	1	8
1	16	1	64	1	32	1	128	1	64	1	4	1	16	1	64	1	32	1	8	1	8	1	4	1	16	1	0.5	1	8
1	8	1	64	1	32	1	128	1	64	1	4	1	16	1	64	1	32	1	8	1	8	1	4	1	16	1	1	1	8
1	16	1	64	1	32	1	128	1	64	1	4	1	16	1	64	1	32	1	8	1	8	1	2	1	16	1	0.5	1	8
1	8	1	64	1	32	1	128	1	64	1	4	1	2	1	64	1	32	1	2	1	8	1	1	1	16	1	4	1	8
1	16	1	64	1	32	1	64	1	64	1	4	1	2	1	64	1	32	1	4	1	8	1	2	1	16	1	0.25	1	8
1	8	1	64	1	32	1	128	1	64	1	4	1	1	1	64	1	16	1	1	1	8	1	0.5	1	16	1	4	1	8
1	8	1	64	1	32	1	128	1	64	1	4	1	2	1	64	1	32	1	8	1	8	1	2	1	8	1	8	1	8
1	8	1	64	1	32	1	128	1	64	1	4	1	2	1	64	1	32	1	2	1	8	1	2	1	16	1	8	1	8
1	32	1	64	1	32	1	128	1	64	1	4	1	16	1	64	1	32	1	8	1	8	1	2	1	16	1	8	1	8
1	32	1	64	1	32	1	128	1	64	1	4	1	16	1	64	1	32	1	8	1	8	1	4	1	16	1	8	1	8
1	8	1	64	1	32	1	128	1	64	1	4	1	16	1	64	1	16	1	8	1	8	1	2	1	8	1	0.12	1	8
1	32	1	64	1	32	1	128	1	64	1	4	1	16	1	64	1	32	1	8	1	8	1	4	1	16	1	0.5	1	8
1	16	1	64	1	32	1	128	1	64	1	4	1	16	1	64	1	32	1	8	1	8	1	4	1	16	1	0.5	1	8
1	8	1	64	1	32	1	128	1	64	1	4	1	16	1	64	1	32	1	8	1	8	1	1	1	16	1	0.5	1	8
1	4	1	64	1	32	1	128	1	64	1	4	1	16	1	64	1	16	1	8	1	8	1	0.25	1	16	1	0.25	1	8
1	8	1	64	1	32	1	128	1	64	1	4	1	16	1	64	1	32	1	8	1	8	1	4	1	16	1	0.5	1	8
1	8	1	64	1	32	1	128	1	64	1	4	1	16	1	64	1	32	1	8	1	8	1	4	1	16	1	0.5	1	8
1	8	1	64	1	32	1	128	1	64	1	4	1	16	1	64	1	16	1	8	1	8	1	1	1	16	1	8	1	8
1	8	1	64	1	32	1	128	1	64	1	4	1	16	1	64	1	32	1	8	1	8	1	0.12	1	16	1	1	1	8
1	8	1	64	1	32	1	128	1	64	1	4	1	16	1	64	1	16	1	8	1	8	1	1	1	16	1	8	1	8
1	8	1	64	1	32	1	128	1	64	1	4	1	16	1	64	1	32	1	8	1	8	1	0.5	1	16	1	8	1	8
1	8	1	64	1	32	1	128	1	64	1	4	1	16	1	64	1	4	1	8	1	8	1	0.5	1	16	1	4	1	8
1	4	1	64	1	32	1	32	1	64	1	4	1	16	1	64	1	8	1	8	1	8	1	0.25	1	8	1	2	1	8
1	8	1	64	1	32	1	128	1	64	1	4	1	16	1	64	1	32	1	8	1	8	1	4	1	16	1	16	1	8
1	4	1	64	1	32	1	64	1	64	1	4	1	16	1	64	1	8	1	8	1	2	1	1	1	16	1	16	1	8
1	4	1	64	1	32	1	64	1	64	1	4	1	16	1	64	1	16	1	8	1	8	1	0.5	1	16	1	16	1	8
1	64	1	64	1	32	1	64	1	64	1	4	1	16	1	64	1	16	1	8	1	8	1	1	1	16	1	16	1	8
1	4	1	64	1	32	1	128	1	64	1	4	1	4	1	64	1	2	1	1	1	8	1	0.5	1	16	1	0.25	1	8
1	4	1	64	1	32	1	128	1	64	1	4	1	16	1	64	1	4	1	8	1	8	1	0.5	1	8	1	1	1	8
1	4	1	64	1	32	1	128	1	64	1	4	1	16	1	64	1	4	1	8	1	8	1	0.5	1	8	1	1	1	8
0	8	0	64	0	32	0	128	0	64	0	4	0	16	0	64	0	16	0	8	0	8	0	2	0	16	0	0.25	0	8
0	8	0	64	0	32	0	128	0	64	0	4	0	16	0	64	0	16	0	8	0	8	0	2	0	16	0	0.5	0	8
0	64	0	64	0	32	0	128	0	64	0	4	0	16	0	64	0	32	0	8	0	8	0	4	0	16	0	16	0	8
0	8	0	64	0	32	0	128	0	64	0	4	0	16	0	64	0	32	0	8	0	8	0	1	0	16	0	16	0	8
0	8	0	64	0	32	0	128	0	64	0	4	0	16	0	64	0	32	0	8	0	8	0	0.5	0	16	0	16	0	8
0	8	0	64	0	32	0	128	0	64	0	4	0	16	0	64	0	16	0	8	0	8	0	0.5	0	16	0	16	0	8
0	8	0	64	0	32	0	128	0	64	0	4	0	16	0	64	0	32	0	8	0	8	0	1	0	16	0	16	0	8
0	32	0	64	0	32	0	64	0	64	0	4	0	16	0	64	0	16	0	8	0	2	0	1	0	16	0	16	0	8
0	4	0	64	0	32	0	64	0	64	0	4	0	16	0	32	0	4	0	8	0	8	0	0.12	0	4	0	16	0	8
0	8	0	64	0	32	0	64	0	64	0	4	0	16	0	64	0	32	0	8	0	8	0	2	0	8	0	8	0	8
0	64	0	64	0	32	0	128	0	64	0	4	0	16	0	64	0	32	0	8	0	8	0	4	0	16	0	16	0	8
0	32	0	64	0	32	0	128	0	64	0	4	0	16	0	64	0	32	0	8	0	8	0	4	0	16	0	16	0	8
0	16	0	64	0	32	0	128	0	64	0	4	0	16	0	64	0	32	0	8	0	8	0	2	0	16	0	16	0	8
0	32	0	64	0	32	0	128	0	64	0	4	0	16	0	64	0	32	0	8	0	8	0	0.5	0	16	0	16	0	8
0	16	0	64	0	32	0	64	0	64	0	4	0	16	0	64	0	32	0	8	0	8	0	4	0	16	0	0.12	0	8
0	32	0	64	0	32	0	128	0	64	0	4	0	16	0	64	0	32	0	8	0	8	0	4	0	16	0	2	0	8
0	8	0	64	0	32	0	128	0	64	0	4	0	16	0	64	0	32	0	8	0	8	0	0.5	0	8	0	0.5	0	8
0	8	0	64	0	32	0	128	0	64	0	4	0	16	0	32	0	32	0	8	0	8	0	2	0	16	0	4	0	8
0	8	0	64	0	32	0	128	0	64	0	4	0	16	0	64	0	32	0	8	0	8	0	1	0	8	0	0.25	0	8
0	4	0	64	0	32	0	128	0	64	0	4	0	16	0	64	0	16	0	8	0	8	0	4	0	16	0	0.12	0	8
0	16	0	64	0	32	0	128	0	64	0	4	0	16	0	64	0	16	0	8	0	8	0	0.25	0	8	0	0.5	0	8
0	8	0	64	0	32	0	128	0	64	0	4	0	16	0	64	0	16	0	8	0	8	0	2	0	16	0	2	0	8
0	16	0	64	0	32	0	128	0	64	0	4	0	16	0	64	0	16	0	8	0	8	0	2	0	16	0	0.25	0	8
0	8	0	64	0	32	0	128	0	64	0	4	0	16	0	64	0	4	0	8	0	4	0	1	0	16	0	0.12	0	8
0	8	0	64	0	32	0	128	0	64	0	4	0	16	0	64	0	32	0	8	0	8	0	4	0	16	0	16	0	8
0	8	0	64	0	32	0	128	0	64	0	4	0	16	0	64	0	32	0	8	0	8	0	4	0	16	0	0.12	0	8
0	8	0	64	0	32	0	128	0	64	0	4	0	16	0	32	0	8	0	8	0	8	0	0.25	0	16	0	16	0	8
0	8	0	64	0	32	0	64	0	64	0	4	0	16	0	32	0	8	0	8	0	8	0	1	0	8	0	16	0	8
0	16	0	64	0	32	0	128	0	64	0	4	0	16	0	64	0	32	0	8	0	8	0	1	0	16	0	16	0	8
0	64	0	64	0	32	0	128	0	64	0	4	0	16	0	64	0	32	0	8	0	8	0	4	0	16	0	16	0	8
0	16	0	64	0	32	0	128	0	64	0	4	0	16	0	64	0	32	0	8	0	8	0	2	0	16	0	4	0	8
